# Supplementary material for: Effectiveness of Upadacitinib in Patients with Atopic Dermatitis including those with Inadequate Response to Dupilumab and/or Baricitinib: Results from the BioDay Registry
Source: PubMed Central journal article supplement — Acta Derm Venereol. 2023 Feb 16;103:5243. doi: 10.2340/actadv.v103.5243 (PMC9949218; doi:10.2340/actadv.v103.5243), 2023-02-16
Supplement: ActaDV-103-5243-s1.pdf [file ActaDV-103-5243-s1.pdf]

Supplementary material has been published as submitted. It has not been copyedited, typeset or checked for scientific content by Acta Dermato-Venereologica

**Table SI. Patient Global Assessment of Disease Status (PGADS) questionnaire**

**Patients with atopic dermatitis**

**Patient Global Assessment of Disease Status**

Considering all the ways your atopic dermatitis has affected you, how do you feel?

- Poor
- Fair
- Good
- Very Good
- Excellent

**Table SII. Effectiveness and adverse events stratified by upadacitinib dosage**

|                                                          | Upadacitinib 15mg QD | Upadacitinib 30mg QD | p-value |
|----------------------------------------------------------|----------------------|----------------------|---------|
| <b>Immunosuppressive therapy at baseline, No. (%)</b>    | 28 (70.0)            | 4 (57.1)             | 0.501   |
| <b>Effectiveness</b>                                     |                      |                      |         |
| Baseline                                                 | N=40                 | N=7                  |         |
| Mean EASI (SD)                                           | 16.2 (10.7)          | 18.8 (8.9)           | 0.532   |
| EASI $\leq$ 7, No. (%)                                   | 6 (15.0)             | 0 (0)                | 0.273   |
| NRS-pruritus $\leq$ 4, No. (%)                           | 6 (15.0)             | 2 (28.6)             | 0.383   |
| Week 4                                                   | N=39                 | N=8                  |         |
| Mean EASI (SD)                                           | 7.3 (5.2)            | 8.7 (10.0)           | 0.560   |
| EASI $\leq$ 7, No. (%)                                   | 18 (46.2)            | 4 (50.0)             | 0.562   |
| NRS-pruritus $\leq$ 4, No. (%)                           | 18 (46.2)            | 5 (62.5)             | 0.405   |
| Week 8                                                   | N=34                 | N=8                  |         |
| Mean EASI (SD)                                           | 5.2 (4.2)            | 6.8 (3.7)            | 0.342   |
| EASI $\leq$ 7, No. (%)                                   | 23 (67.6)            | 6 (75.0)             | 0.689   |
| NRS-pruritus $\leq$ 4, No. (%)                           | 16 (47.1)            | 3 (37.5)             | 0.737   |
| Week 16                                                  | N=28                 | N=10                 |         |
| Mean EASI (SD)                                           | 4.8 (3.8)            | 7.9 (6.1)            | 0.057   |
| EASI $\leq$ 7, No. (%)                                   | 21 (75.0)            | 6 (60.0)             | 0.369   |
| NRS-pruritus $\leq$ 4, No. (%)                           | 21 (75.0)            | 5 (50.0)             | 0.150   |
| <b>Patients with adverse events<sup>a</sup>, No. (%)</b> |                      |                      | 0.315   |
| Week 4                                                   | 11 (27.5)            | 3 (37.5)             |         |
| Week 8                                                   | 6 (17.6)             | 0 (0)                |         |
| Week 16                                                  | 5 (17.9)             | 3 (30.0)             |         |

<sup>a</sup>Week number refers to the timepoint the adverse event started. QD: Once Daily; SD: Standard Deviation; EASI: Eczema Area and Severity Index; NRS: Numeric Rating Scale.

**Table SIII. Patients with switch in upadacitinib dosage during 16 weeks of treatment**

| Patient number | Timepoint of switch | Reason of switch   | Dose (QD) | EASI, IGA, NRS - BL | EASI, IGA, NRS - wk4 | EASI, IGA, NRS - wk8 | EASI, IGA, NRS - wk16 | Drug discontinued |
|----------------|---------------------|--------------------|-----------|---------------------|----------------------|----------------------|-----------------------|-------------------|
| 1              | BL-wk4              | Ineffectiveness    | 15→30mg   | 17.8, Moderate, 9   | 30.5 Severe, 9       | NA                   | NA                    | Yes, wk4          |
| 2              | Wk4                 | Partial response   | 15→30mg   | 45.2 Very severe, 4 | 22.9 Severe, 3       | 13.1 Moderate, 6     | 7.9 Moderate, 1       | No                |
| 3              | Wk4                 | Partial response   | 15→30mg   | -                   | 8.2 Moderate, 2      | -                    | 4.6 Moderate, 6       | Yes, wk8          |
| 4              | Wk8                 | Controlled disease | 30→15mg   | 37.4 Severe, 2      | 13.4 Moderate, 1     | 10.6 Mild, 2         | 16.2 Moderate, 3      | No                |
| 5              | Wk8                 | Ineffectiveness    | 15→30mg   | 7.5 Moderate, 8     | 5.0 Mild, 7          | 7.8 Mild, 8          | 13.2 Moderate, 8      | Yes, wk16         |
| 6              | Wk8                 | Ineffectiveness    | 15→30mg   | 30.4 Severe, 9      | 8.8 Mild, 5          | -                    | 21.7 Severe, 8        | Yes, wk16         |
| 7              | Wk8                 | Partial response   | 15→30mg   | 14.6 Moderate, 9    | - Mild, 6            | 5.0 Mild, 6          | 6.6 Mild, 4           | No                |
| 8              | Wk8                 | Partial response   | 15→30mg   | 6.9 Moderate, 7     | 7.3 Moderate, 8      | 9.0 Moderate, 7      | 3.1 Mild, 7           | No                |

EASI: Eczema Area and Severity Index; IGA: Investigator Global Assessment; BL: Baseline; Wk: Week; QD: Once Daily; NA: Not Applicable due to treatment discontinuation. –Not measured.

**Table SIV. AD disease course in patients with upadacitinib treatment who previous had inadequate response to both baricitinib and dupilumab treatment**

| Patient number | EASI, IGA, NRS - BL | EASI, IGA, NRS - wk4 | EASI, IGA, NRS - wk8 | EASI, IGA, NRS - wk16 | Drug discontinued                   |
|----------------|---------------------|----------------------|----------------------|-----------------------|-------------------------------------|
| 1              | 7.8 Severe, 7       | -                    | -                    | 2.2 Almost clear, 3   | No                                  |
| 2              | 13.6 Severe, 8      | 2.5 Almost clear, 4  | 6.9 Mild, 6          | 3.9 Mild, 6           | No                                  |
| 3              | 7.5 Moderate, 8     | 5.0 Mild, 7          | 7.8 Mild, 8          | 13.2 Moderate, 8      | Yes, due to ineffectiveness at wk16 |
| 4              | 20.9 Severe, 8      | 8.6 Mild, 6          | 8.4 Mild, 3          | 8.0 Mild, 3           | No                                  |
| 5              | -                   | 1.5 Mild, 5          | -                    | 6.9 Mild, 1           | No                                  |
| 6              | 27.3 Severe, 10     | 11.1 Moderate, 6     | 7.4 Mild, 5          | 8.6 Moderate, 5       | No                                  |
| 7              | 6.9 Moderate, 7     | 7.3 Moderate, 8      | 9.0 Moderate, 7      | 3.1 Mild, 7           | No                                  |

AD: Atopic Dermatitis; EASI: Eczema Area and Severity Index; IGA: Investigator Global Assessment; BL: Baseline; Wk: Week. –Not measured.
